# Supplementary material
Source: Springer Nature journal article supplement (https://www.springermedizin.de/resource/supplementary/12967_2011_759_MOESM2_ESM.pdf/9577452)
Supplement: MOESM2 [file 9577452]

HMGB1 (DAMP)

DNA/Chromatin

Individual  
Viable  
Cell

Severe Trauma

Apoptosis

DAMP  
Receptor

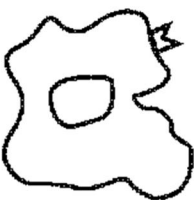

Immune  
Cell

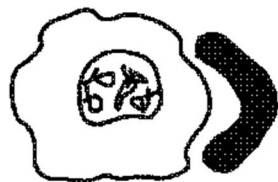

Phagocyte/  
inflammation

Apoptosis Cell  
w/ chromatin-bound  
HMGB1

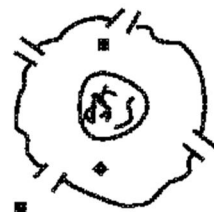

Necrotic Cell  
w/HMGB1  
Release

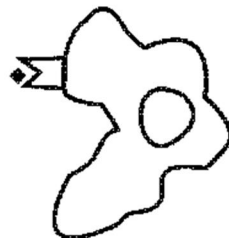

Immune  
Cell
